# Supplementary material for: Not straightforward: modelling non-linearity in training load and injury research
Source: HighWire-hosted journal article supplement (doi:10.1136/bmjsem-2021-001119), 2021-08-01
Supplement: bmjsem-2021-001119supp001_data_supplement.pdf [file bmjsem-2021-001119supp001_data_supplement.pdf]

## SUPPLEMENTARY RESULTS

### Tables

**Table S1.** Data quality comparison of sports cohorts: the Norwegian elite U-19 football data (55% male, age; mean  $\pm$  standard deviation (SD) =  $17 \pm 1$  years), Norwegian Premier League football data (all male, age  $26 \pm 4$  years) and elite youth handball data (36% male, age  $17 \pm 0.9$  years).

|              |                                            | Football U-19 | Football Elite | Handball     |
|--------------|--------------------------------------------|---------------|----------------|--------------|
| Sample Size  | Number of athletes                         | 81            | 36             | 205          |
|              | Number of sRPE values before imputation    | 6 424         | 6 061          | 17 268       |
|              | Number of sRPE values after imputation     | 8 495         | 10 232         | 47 651       |
|              | Number of injuries                         | 81            | 38             | 472          |
|              | Number of injuries per athlete, mean (SD)  | 1 (1.2)       | 1 (1.5)        | 2.3 (2.9)    |
| Missing data | Missing load values, n (%)                 | 2 071 (24%)   | 4 171 (41%)    | 30 383 (64%) |
|              | Missing load values per athlete, mean (SD) | 26 (32)       | 116 (62)       | 148 (71)     |
| Timelines    | Mean (SD) answering time, days             | 0.3 (0.7)     | 0.01 (0.2)     | 0.7 (1.6)    |
|              | Percentage of forms answered the same day  | 72%           | 99%            | 53%          |
|              | Max answering time, days                   | 9             | 4              | 119          |

Abbreviations: Football Elite, Norwegian Premier League; sRPE, session Rating of Perceived Exertion

**Table S2.** Overview of injury definition and models run on each sport population, with the number of load values and the number of injuries used in each model.

| Population              | Injury Definition <sup>1</sup> | Load Definition <sup>2</sup> | Load Values (n) <sup>3</sup> | Injuries (n) <sup>3</sup> |
|-------------------------|--------------------------------|------------------------------|------------------------------|---------------------------|
| Football U-19 (n = 81)  | Same day                       | sRPE                         | 8495                         | 81                        |
|                         |                                | Daily ACWR 7:21-period       | 6308                         | 43                        |
|                         | Next 4 days                    | sRPE                         | 8495                         | 210                       |
|                         |                                | Daily ACWR 7:21-period       | 6308                         | 129                       |
| Football Elite (n = 36) | Next micro-cycle               | Micro-cycle ACWR 1:3-period  | 793                          | 26                        |
|                         |                                |                              |                              |                           |
|                         | Same day                       | sRPE                         | 10 232                       | 38                        |
|                         |                                | Daily ACWR 7:21-period       | 9 260                        | 32                        |
| Handball (n = 205)      | Next 4 days                    | sRPE                         | 10 232                       | 44                        |
|                         |                                | Daily ACWR 7:21-period       | 9 260                        | 34                        |
|                         | Next micro-cycle               | Micro-cycle ACWR 1:3-period  | 553                          | 26                        |
|                         |                                |                              |                              |                           |
|                         | Same day                       | sRPE                         | 47 651                       | 472                       |
|                         |                                | Daily ACWR 7:21-period       | 42 116                       | 320                       |
|                         | Next 4 days                    | sRPE                         | 47 651                       | 1 136                     |
|                         |                                | Daily ACWR 7:21-period       | 42 116                       | 714                       |
|                         | Next micro-cycle               | Micro-cycle ACWR 1:3-period  | 1 897                        | 242                       |

Abbreviations: ACWR, Acute: Chronic Workload Ratio; Football Elite, Norwegian Premier League; sRPE = daily session Rating of Perceived Exertion; TL, Training Load.

<sup>1</sup>Same day was injury same day as the measured load value; Next 4 days was one or more injuries during the four days after the measured load value; Next micro-cycle was one or more injuries during the micro-cycle after the micro-cycle of the measured load values.

<sup>2</sup>Daily ACWR 7:21-period was the 7-day acute sRPE divided by previous 21-day chronic sRPE per day; Micro-cycle ACWR 1:3-period was the 1-micro-cycle acute sRPE divided by previous 3-micro-cycle chronic sRPE per micro-cycle. A micro-cycle was defined as all recovery days after the previous match as well as the training days before the next match.

<sup>3</sup>Due to aggregations, ACWR calculations and injury time-windows, the number of load values and injury events varied between models.

**Table S3.** Odds ratio with 95% confidence intervals, standard error, degrees of freedom and p-values from modelling the relationship between training load and injury risk using mixed effect models with restricted cubic splines.

| Population    | Load Definition <sup>1</sup> | Injury Definition <sup>2</sup> | Variable         | OR <sup>3</sup> | CI 2.5% | CI 97.5% | SE    | df   | p      |
|---------------|------------------------------|--------------------------------|------------------|-----------------|---------|----------|-------|------|--------|
| Football U-19 | sRPE                         | Same day                       | Intercept        | 0.004           | <0.001  | 0.939    | 2.808 | 941  | 0.047  |
|               |                              |                                | Load             | 1.000           | 0.997   | 1.003    | 0.002 | 3331 | 0.837  |
|               |                              |                                | Load'            | 1.001           | 0.997   | 1.004    | 0.002 | 3337 | 0.746  |
|               |                              |                                | Sex Female (Ref) | -               | -       | -        | -     | -    | -      |
|               |                              |                                | Sex Male         | 1.163           | 0.628   | 2.155    | 0.314 | 3286 | 0.631  |
|               |                              |                                | Age (Years)      | 1.088           | 0.800   | 1.479    | 0.157 | 921  | 0.592  |
|               |                              | Next 4 days                    | Intercept        | 0.031           | <0.001  | 13.614   | 3.094 | 273  | 0.262  |
|               |                              |                                | Load             | 1.001           | 1.000   | 1.002    | 0.001 | 4253 | 0.179  |
|               |                              |                                | Load'            | 0.999           | 0.998   | 1.001    | 0.001 | 3386 | 0.502  |
|               |                              |                                | Sex Female (Ref) | -               | -       | -        | -     | -    | -      |
|               |                              |                                | Sex Male         | 1.181           | 0.582   | 2.400    | 0.362 | 4727 | 0.645  |
|               |                              |                                | Age (Years)      | 0.973           | 0.689   | 1.373    | 0.175 | 261  | 0.874  |
|               | Daily ACWR 7:21-period       | Same day                       | Intercept        | 0.002           | <0.001  | 1.073    | 3.233 | 1088 | 0.053  |
|               |                              |                                | Load             | 0.778           | 0.313   | 1.936    | 0.465 | 1896 | 0.589  |
|               |                              |                                | Load'            | 2.970           | 0.586   | 15.057   | 0.827 | 1268 | 0.189  |
|               |                              |                                | Sex Female (Ref) | -               | -       | -        | -     | -    | -      |
|               |                              |                                | Sex Male         | 1.326           | 0.648   | 2.716    | 0.365 | 2592 | 0.440  |
|               |                              |                                | Age (Years)      | 1.118           | 0.785   | 1.594    | 0.181 | 1131 | 0.536  |
|               |                              | Next 4 days                    | Intercept        | <0.001          | <0.001  | 25.567   | 6.179 | 104  | 0.148  |
|               |                              |                                | Load             | 4.285           | 1.241   | 14.793   | 0.631 | 498  | 0.021  |
|               |                              |                                | Load'            | 0.032           | 0.007   | 0.139    | 0.745 | 1565 | <0.001 |
|               |                              |                                | Sex Female (Ref) | -               | -       | -        | -     | -    | -      |
|               |                              |                                | Sex Male         | 1.278           | 0.381   | 4.283    | 0.617 | 2328 | 0.691  |
|               |                              |                                | Age (Years)      | 1.160           | 0.594   | 2.266    | 0.338 | 110  | 0.661  |

Continues on the next page

| Population     | Load Definition <sup>1</sup> | Injury Definition <sup>2</sup> | Variable         | OR <sup>3</sup> | CI 2.50 % | CI 97.50 % | SE     | df   | p      |
|----------------|------------------------------|--------------------------------|------------------|-----------------|-----------|------------|--------|------|--------|
| Football U-19  | Micro-cycle ACWR 1:3-period  | Next micro-cycle               | Intercept        | 0.041           | <0.001    | 40.086     | 3.502  | 396  | 0.362  |
|                |                              |                                | Load             | 0.210           | 0.012     | 3.536      | 1.439  | 562  | 0.278  |
|                |                              |                                | Load'            | 8.535           | <0.001    | 6136037    | 6.857  | 356  | 0.755  |
|                |                              |                                | Load''           | 0.144           | <0.001    | 3.52E+20   | 25.026 | 296  | 0.938  |
|                |                              |                                | Sex Female (Ref) | -               | -         | -          | -      | -    | -      |
|                |                              |                                | Sex Male         | 1.107           | 0.478     | 2.563      | 0.427  | 641  | 0.812  |
| Football Elite | sRPE                         | Same day                       | Age (Years)      | 1.070           | 0.732     | 1.563      | 0.193  | 358  | 0.726  |
|                |                              |                                | Intercept        | 0.001           | <0.001    | 0.011      | 1.437  | 4480 | <0.001 |
|                |                              |                                | Load             | 1.000           | 0.995     | 1.005      | 0.003  | 4479 | 0.897  |
|                |                              |                                | Load'            | 1.001           | 0.994     | 1.008      | 0.004  | 4475 | 0.847  |
|                |                              |                                | Age (Years)      | 1.096           | 0.997     | 1.204      | 0.048  | 4480 | 0.056  |
|                |                              |                                | Intercept        | <0.001          | <0.001    | 0.022      | 2.581  | 1593 | 0.001  |
|                |                              | Next 4 days                    | Load             | 0.998           | 0.994     | 1.003      | 0.002  | 168  | 0.501  |
|                |                              |                                | Load'            | 1.004           | 0.997     | 1.011      | 0.003  | 99   | 0.29   |
|                |                              |                                | Intercept        | <0.001          | <0.001    | 0.022      | 2.465  | 55   | 0.001  |
|                |                              | Daily ACWR 7:21-period         | Load             | 3.389           | 0.042     | 273.286    | 2.119  | 22   | 0.57   |
|                |                              |                                | Load'            | 0.337           | 0.004     | 31.613     | 2.201  | 24   | 0.626  |
|                |                              |                                | Age (Years)      | 1.104           | 0.994     | 1.226      | 0.053  | 3833 | 0.064  |
|                |                              |                                | Age (Years)      | 1.186           | 0.991     | 1.418      | 0.091  | 1662 | 0.062  |
|                |                              |                                | Intercept        | <0.001          | <0.001    | 0.015      | 3.485  | 300  | 0.002  |
|                |                              |                                | Age (Years)      | 1.202           | 0.978     | 1.477      | 0.105  | 1349 | 0.081  |
|                |                              | Micro-cycle ACWR 1:3-period    | Load             | 6.731           | 0.116     | 390.17     | 1.948  | 20   | 0.339  |
|                |                              |                                | Load'            | 0.056           | 0.001     | 5.583      | 2.252  | 29   | 0.21   |
|                |                              |                                | Intercept        | <0.001          | <0.001    | 0.136      | 2.841  | 62   | 0.009  |
|                |                              |                                | Age (Years)      | 1.113           | 1.016     | 1.219      | 0.046  | 476  | 0.021  |
|                |                              |                                | Load             | 7.523           | 0.030     | 1881.323   | 2.742  | 46   | 0.466  |
|                |                              |                                | Load'            | 0.340           | 0.005     | 22.344     | 2.113  | 112  | 0.610  |

Continues on the next page

| Population | Load Definition <sup>1</sup> | Injury Definition <sup>2</sup> | Variable         | OR <sup>3</sup> | CI 2.50 % | CI 97.50 % | SE     | df    | p      |
|------------|------------------------------|--------------------------------|------------------|-----------------|-----------|------------|--------|-------|--------|
| Handball   | sRPE                         | Same day                       | Intercept        | 0.083           | 0.003     | 2.711      | 1.777  | 1632  | 0.162  |
|            |                              |                                | Load             | 0.999           | 0.998     | 0.999      | <0.001 | 9445  | <0.001 |
|            |                              |                                | Load'            | 1.002           | 1.001     | 1.003      | 0.001  | 2603  | <0.001 |
|            |                              |                                | Sex Female (Ref) | -               | -         | -          | -      | -     | -      |
|            |                              |                                | Sex Male         | 1.112           | 0.780     | 1.586      | 0.181  | 11867 | 0.556  |
|            |                              |                                | Age (Years)      | 0.963           | 0.787     | 1.177      | 0.102  | 1740  | 0.711  |
|            |                              | Next 4 days                    | Intercept        | 0.606           | 0.007     | 54.891     | 2.297  | 1270  | 0.827  |
|            |                              |                                | Load             | 1.000           | 1.000     | 1.001      | <0.001 | 39    | 0.063  |
|            |                              |                                | Load'            | 0.999           | 0.999     | 1.000      | <0.001 | 21    | 0.143  |
|            |                              |                                | Sex Female (Ref) | -               | -         | -          | -      | -     | -      |
|            |                              |                                | Sex Male         | 1.053           | 0.645     | 1.719      | 0.25   | 11521 | 0.837  |
|            |                              |                                | Age (Years)      | 0.87            | 0.67      | 1.129      | 0.133  | 1146  | 0.294  |
|            | Daily ACWR 7:21-period       | Same day                       | Intercept        | 0.041           | 0.001     | 2.833      | 2.157  | 3372  | 0.140  |
|            |                              |                                | Load             | 0.743           | 0.362     | 1.523      | 0.366  | 1301  | 0.417  |
|            |                              |                                | Load'            | 1.648           | 0.687     | 3.952      | 0.445  | 394   | 0.262  |
|            |                              |                                | Sex Female (Ref) | -               | -         | -          | -      | -     | -      |
|            |                              |                                | Sex Male         | 1.127           | 0.729     | 1.741      | 0.222  | 8737  | 0.591  |
|            |                              |                                | Age (Years)      | 0.989           | 0.776     | 1.259      | 0.124  | 3357  | 0.926  |
|            |                              | Next 4 days                    | Intercept        | 0.234           | 0.001     | 99.719     | 3.088  | 2022  | 0.638  |
|            |                              |                                | Load             | 2.006           | 1.006     | 4.002      | 0.348  | 98    | 0.048  |
|            |                              |                                | Load'            | 0.292           | 0.133     | 0.643      | 0.395  | 70    | 0.003  |
|            |                              |                                | Sex Female (Ref) | -               | -         | -          | -      | -     | -      |
|            |                              |                                | Sex Male         | 1.316           | 0.708     | 2.449      | 0.317  | 7490  | 0.385  |
|            |                              |                                | Age (Years)      | 0.886           | 0.624     | 1.257      | 0.179  | 1426  | 0.497  |

Continues on the next page

| Population | Load Definition <sup>1</sup> | Injury Definition <sup>2</sup> | Variable         | OR <sup>3</sup> | CI 2.50 % | CI 97.50 % | SE    | df   | p     |
|------------|------------------------------|--------------------------------|------------------|-----------------|-----------|------------|-------|------|-------|
| Handball   | Micro-cycle ACWR 1:3-period  | Next micro-cycle               | Intercept        | 0.165           | 0.003     | 9.425      | 2.062 | 1450 | 0.382 |
|            |                              |                                | Load             | 0.878           | 0.397     | 1.939      | 0.404 | 955  | 0.747 |
|            |                              |                                | Load'            | 1.335           | 0.599     | 2.976      | 0.408 | 969  | 0.479 |
|            |                              |                                | Sex Female (Ref) | -               | -         | -          | -     | -    | -     |
|            |                              |                                | Sex Male         | 0.908           | 0.596     | 1.384      | 0.215 | 1551 | 0.654 |
|            |                              |                                | Age (Years)      | 1.004           | 0.795     | 1.267      | 0.119 | 1313 | 0.976 |

Abbreviations: ACWR, Acute: Chronic Workload Ratio; CI, 95% Confidence Intervals; df, Degrees of Freedom; Football Elite, Norwegian Premier League; OR, Odds Ratio; SE, Standard Error; sRPE, daily session Rating of Perceived Exertion.

<sup>1</sup>Daily ACWR 7:21-period was the 7-day acute sRPE divided by previous 21-day chronic sRPE per day; Micro-cycle ACWR 1:3-period was the 1-micro-cycle acute sRPE divided by previous 3-micro-cycle chronic sRPE per micro-cycle. A micro-cycle was defined as all recovery days after the previous match as well as the training days before the next match.

<sup>2</sup>Same day was injury same day as the measured load value; Next 4 days was one or more injuries during the four days after the measured load value; Next micro-cycle was one or more injuries during the micro-cycle after the micro-cycle of the measured load values.

<sup>3</sup>As load was fitted with cubic splines, the effect-size, Odds Ratio, is uninterpretable for this parameter.

**Table S4.** Odds ratio with 95% confidence intervals, standard error, degrees of freedom and p-values from modelling the relationship between training load and injury risk using mixed effect logistic regression models which assume linearity.

| Population    | Load Definition <sup>1</sup> | Injury Definition <sup>2</sup> | Variable         | OR    | CI 2.5% | CI 97.5% | SE     | df   | p     |
|---------------|------------------------------|--------------------------------|------------------|-------|---------|----------|--------|------|-------|
| Football U-19 | sRPE                         | Same day                       | Intercept        | 0.003 | <0.001  | 0.795    | 2.781  | 942  | 0.041 |
|               |                              |                                | Load             | 1.000 | 0.999   | 1.001    | <0.001 | 3338 | 0.755 |
|               |                              |                                | Sex Female (Ref) | -     | -       | -        | -      | -    | -     |
|               |                              |                                | Sex Male         | 1.165 | 0.629   | 2.156    | 0.314  | 3287 | 0.627 |
|               |                              |                                | Age (Years)      | 1.088 | 0.800   | 1.478    | 0.156  | 922  | 0.591 |
|               |                              | Next 4 days                    | Intercept        | 0.034 | <0.001  | 15.046   | 3.099  | 263  | 0.275 |
|               |                              |                                | Load             | 1.000 | 1.000   | 1.001    | <0.001 | 3015 | 0.067 |
|               |                              |                                | Sex Female (Ref) | -     | -       | -        | -      | -    | -     |
|               |                              |                                | Sex Male         | 1.186 | 0.585   | 2.406    | 0.361  | 4759 | 0.636 |
|               |                              |                                | Age (Years)      | 0.969 | 0.686   | 1.369    | 0.175  | 256  | 0.86  |
|               | Daily ACWR 7:21-period       | Same day                       | Intercept        | 0.001 | <0.001  | 0.405    | 3.181  | 1341 | 0.025 |
|               |                              |                                | Load             | 1.346 | 0.859   | 2.107    | 0.228  | 492  | 0.194 |
|               |                              |                                | Sex Female (Ref) | -     | -       | -        | -      | -    | -     |
|               |                              |                                | Sex Male         | 1.329 | 0.645   | 2.737    | 0.368  | 2601 | 0.440 |
|               |                              |                                | Age (Years)      | 1.139 | 0.798   | 1.625    | 0.181  | 1289 | 0.473 |
|               |                              | Next 4 days                    | Intercept        | 0.003 | <0.001  | 98.996   | 5.313  | 108  | 0.266 |
|               |                              |                                | Load             | 1.312 | 0.633   | 2.722    | 0.372  | 1744 | 0.465 |
|               |                              |                                | Sex Female (Ref) | -     | -       | -        | -      | -    | -     |
|               |                              |                                | Sex Male         | 1.408 | 0.478   | 4.147    | 0.551  | 2514 | 0.535 |
|               |                              |                                | Age (Years)      | 1.052 | 0.583   | 1.899    | 0.298  | 108  | 0.865 |

Continues on the next page

| Population     | Load Definition <sup>1</sup> | Injury Definition <sup>2</sup> | Variable         | OR     | CI 2.5% | CI 97.5% | SE    | df    | p      |
|----------------|------------------------------|--------------------------------|------------------|--------|---------|----------|-------|-------|--------|
| Football U-19  | Micro-cycle ACWR 1:3-period  | Next micro-cycle               | Intercept        | 0.013  | <0.001  | 10.059   | 3.396 | 331   | 0.199  |
|                |                              |                                | Load             | 0.850  | 0.324   | 2.232    | 0.492 | 534   | 0.741  |
|                |                              |                                | Sex Female (Ref) | -      | -       | -        | -     | -     | -      |
|                |                              |                                | Sex Male         | 1.088  | 0.475   | 2.492    | 0.422 | 645   | 0.842  |
|                |                              |                                | Age (Years)      | 1.079  | 0.738   | 1.577    | 0.193 | 299   | 0.694  |
| Football Elite | sRPE                         | Same day                       | Intercept        | 0.001  | <0.001  | 0.008    | 1.344 | 4481  | <0.001 |
|                |                              |                                | Load             | 1.000  | 0.999   | 1.002    | 0.001 | 4481  | 0.867  |
|                |                              |                                | Age (Years)      | 1.096  | 0.998   | 1.204    | 0.048 | 4481  | 0.055  |
|                |                              | Next 4 days                    | Intercept        | <0.001 | <0.001  | 0.014    | 2.572 | 1412  | <0.001 |
|                |                              |                                | Load             | 1.001  | 0.998   | 1.003    | 0.001 | 15    | 0.484  |
|                |                              |                                | Age (Years)      | 1.189  | 0.994   | 1.422    | 0.091 | 1662  | 0.058  |
|                |                              | Daily ACWR 7:21-period         | Intercept        | <0.001 | <0.001  | 0.008    | 1.555 | 3576  | <0.001 |
|                |                              |                                | Load             | 1.255  | 0.459   | 3.427    | 0.512 | 552   | 0.658  |
|                |                              |                                | Age (Years)      | 1.102  | 0.994   | 1.222    | 0.052 | 3847  | 0.064  |
|                | Micro-cycle ACWR 1:3-period  | Next 4 days                    | Intercept        | <0.001 | <0.001  | 0.042    | 2.952 | 1288  | 0.002  |
|                |                              |                                | Load             | 0.739  | 0.253   | 2.165    | 0.539 | 70    | 0.577  |
|                |                              |                                | Age (Years)      | 1.189  | 0.974   | 1.452    | 0.102 | 1356  | 0.089  |
|                |                              | Next micro-cycle               | Intercept        | 0.001  | <0.001  | 0.036    | 1.665 | 186   | <0.001 |
|                |                              |                                | Load             | 2.183  | 0.350   | 13.625   | 0.910 | 47    | 0.396  |
|                |                              |                                | Age (Years)      | 1.115  | 1.018   | 1.221    | 0.046 | 476   | 0.019  |
| Handball       | sRPE                         | Same day                       | Intercept        | 0.063  | 0.002   | 2.082    | 1.782 | 1673  | 0.121  |
|                |                              |                                | Load             | 1.000  | 1.000   | 1.000    | 0.000 | 7341  | 0.240  |
|                |                              |                                | Sex Female (Ref) | -      | -       | -        | -     | -     | -      |
|                |                              |                                | Sex Male         | 1.124  | 0.788   | 1.604    | 0.181 | 11869 | 0.519  |
|                |                              |                                | Age (Years)      | 0.953  | 0.779   | 1.166    | 0.103 | 1739  | 0.638  |
|                |                              |                                |                  |        |         |          |       |       |        |

Continues on the next page

| Population | Load Definition <sup>1</sup> | Injury Definition <sup>2</sup> | Variable         | OR    | CI 2.5% | CI 97.5% | SE     | df    | p     |
|------------|------------------------------|--------------------------------|------------------|-------|---------|----------|--------|-------|-------|
| Handball   | sRPE                         | Next 4 days                    | Intercept        | 0.603 | 0.006   | 56.793   | 2.317  | 1367  | 0.827 |
|            |                              |                                | Load             | 1.000 | 1.000   | 1.000    | <0.001 | 64    | 0.348 |
|            |                              |                                | Sex Female (Ref) | -     | -       | -        | -      | -     | -     |
|            |                              |                                | Sex Male         | 1.045 | 0.641   | 1.705    | 0.250  | 11524 | 0.859 |
|            |                              |                                | Age (Years)      | 0.873 | 0.671   | 1.135    | 0.134  | 1420  | 0.310 |
|            | Daily ACWR 7:21-period       | Same day                       | Intercept        | 0.030 | <0.001  | 2.084    | 2.159  | 2373  | 0.105 |
|            |                              |                                | Load             | 1.106 | 0.846   | 1.445    | 0.136  | 204   | 0.459 |
|            |                              |                                | Sex Female (Ref) | -     | -       | -        | -      | -     | -     |
|            |                              |                                | Sex Male         | 1.129 | 0.730   | 1.748    | 0.223  | 8738  | 0.585 |
|            |                              |                                | Age (Years)      | 0.988 | 0.775   | 1.260    | 0.124  | 3373  | 0.921 |
|            |                              | Next 4 days                    | Intercept        | 0.535 | 0.001   | 233.805  | 3.098  | 899   | 0.840 |
|            |                              |                                | Load             | 0.895 | 0.599   | 1.338    | 0.203  | 118   | 0.587 |
|            |                              |                                | Sex Female (Ref) | -     | -       | -        | -      | -     | -     |
|            |                              |                                | Sex Male         | 1.319 | 0.710   | 2.452    | 0.316  | 7582  | 0.381 |
|            |                              |                                | Age (Years)      | 0.874 | 0.615   | 1.243    | 0.179  | 796   | 0.454 |
|            | Micro-cycle ACWR 1:3-period  | Next micro-cycle               | Intercept        | 0.141 | 0.002   | 12.674   | 2.293  | 1448  | 0.393 |
|            |                              |                                | Load             | 1.125 | 0.716   | 1.769    | 0.230  | 771   | 0.609 |
|            |                              |                                | Sex Female (Ref) | -     | -       | -        | -      | -     | -     |
|            |                              |                                | Sex Male         | 0.908 | 0.567   | 1.453    | 0.240  | 1552  | 0.686 |
|            |                              |                                | Age (Years)      | 1.002 | 0.773   | 1.300    | 0.133  | 1404  | 0.986 |

Abbreviations: ACWR, Acute: Chronic Workload Ratio; CI, 95% Confidence Intervals; df, Degrees of Freedom; Football Elite, Norwegian Premier League; OR, Odds Ratio; SE, Standard Error; sRPE, daily session Rating of Perceived Exertion.

<sup>1</sup>Daily ACWR 7:21-period was the 7-day acute sRPE divided by previous 21-day chronic sRPE per day; Micro-cycle ACWR 1:3-period was the 1-micro-cycle acute sRPE divided by previous 3-micro-cycle chronic sRPE per micro-cycle. A micro-cycle was defined as all recovery days after the previous match as well as the training days before the next match.

<sup>2</sup>Same day was injury same day as the measured load value; Next 4 days was one or more injuries during the four days after the measured load value; Next micro-cycle was one or more injuries during the micro-cycle after the micro-cycle of the measured load values.

## Figures

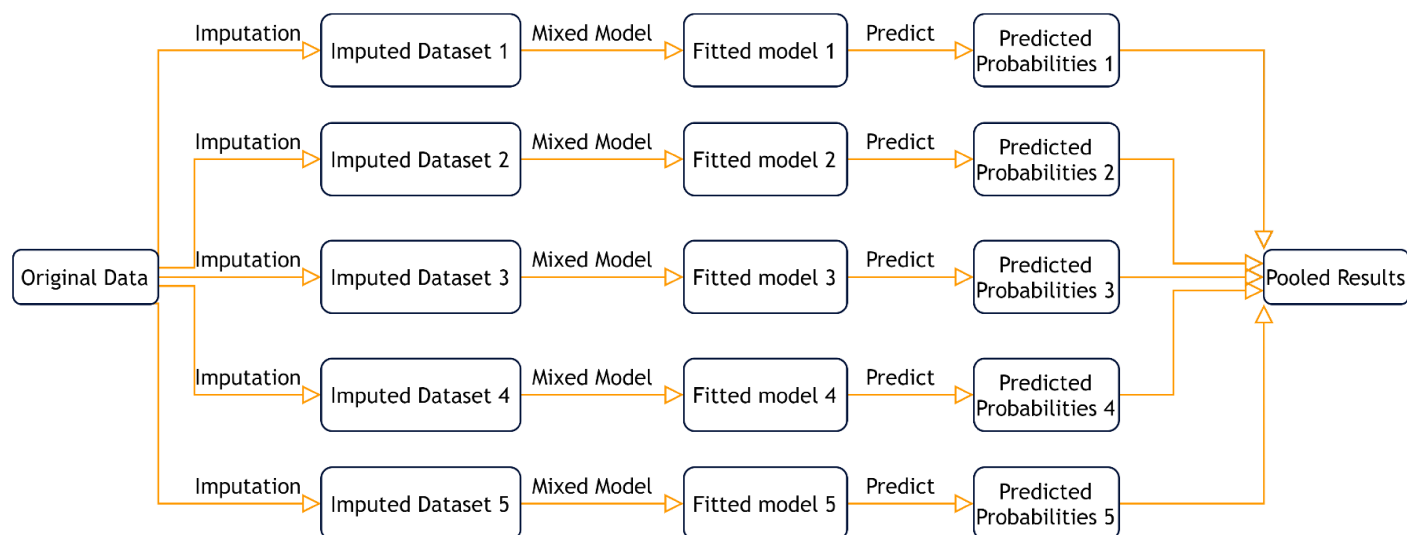

**Figure S1.** Illustration of the modelling process in the framework of multiple imputation. Following the recommendations in “Flexible Imputation of Missing Data, Second Edition” by Stef van Buuren,<sup>1</sup> which is also available online.<sup>2</sup> Missing load and age values were predicted and imputed using predictive mean matching.<sup>3</sup> All non-derived variables were used to predict imputed values, including age, sex, player position, training activity type among others. The response variable, injury, was also used to predict imputed values,<sup>4</sup> but was not itself imputed before analysis (guides in Van Buuren <sup>1</sup> 6.3.2, 6.4.1).<sup>5</sup> The number of imputed datasets, five, is recommended in most cases (Van Buuren section 2.8).<sup>1</sup> A mixed logistic regression model was run on each dataset, returning five fitted models. Each model was used to make predictions, and the mean of the predicted probabilities was used in final visualization, then the model parameters were pooled using Rubin’s rules.<sup>6</sup>

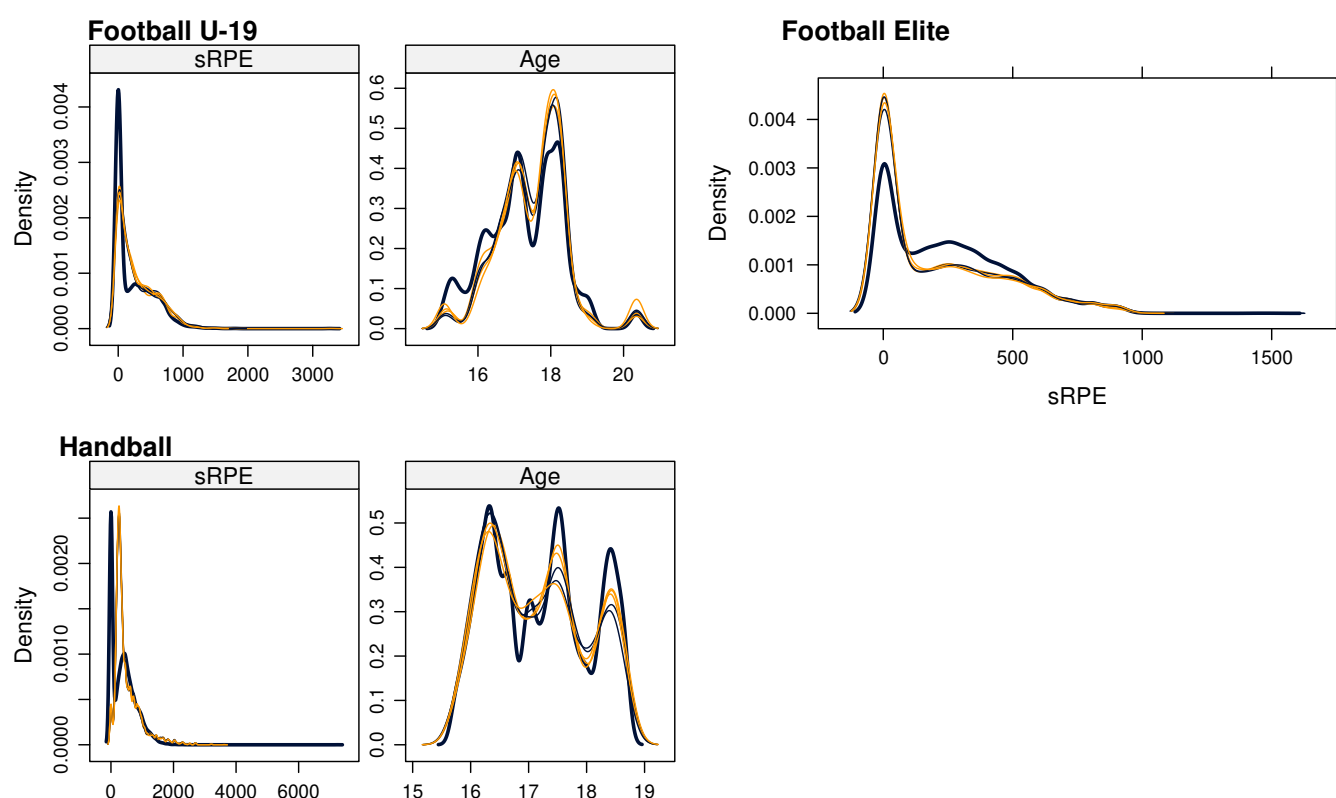

**Figure S2.** Distribution of real data values (blue) compared to imputed values from five imputed datasets (yellow) for the session Rating of Perceived Exertion (sRPE) measured in arbitrary units, and Age (years) in the Norwegian elite U-19 football dataset (Football U-19), the Norwegian Premier League dataset (Football Elite), and the Norwegian elite youth handball dataset. The Norwegian Premier League dataset had no missing age values.

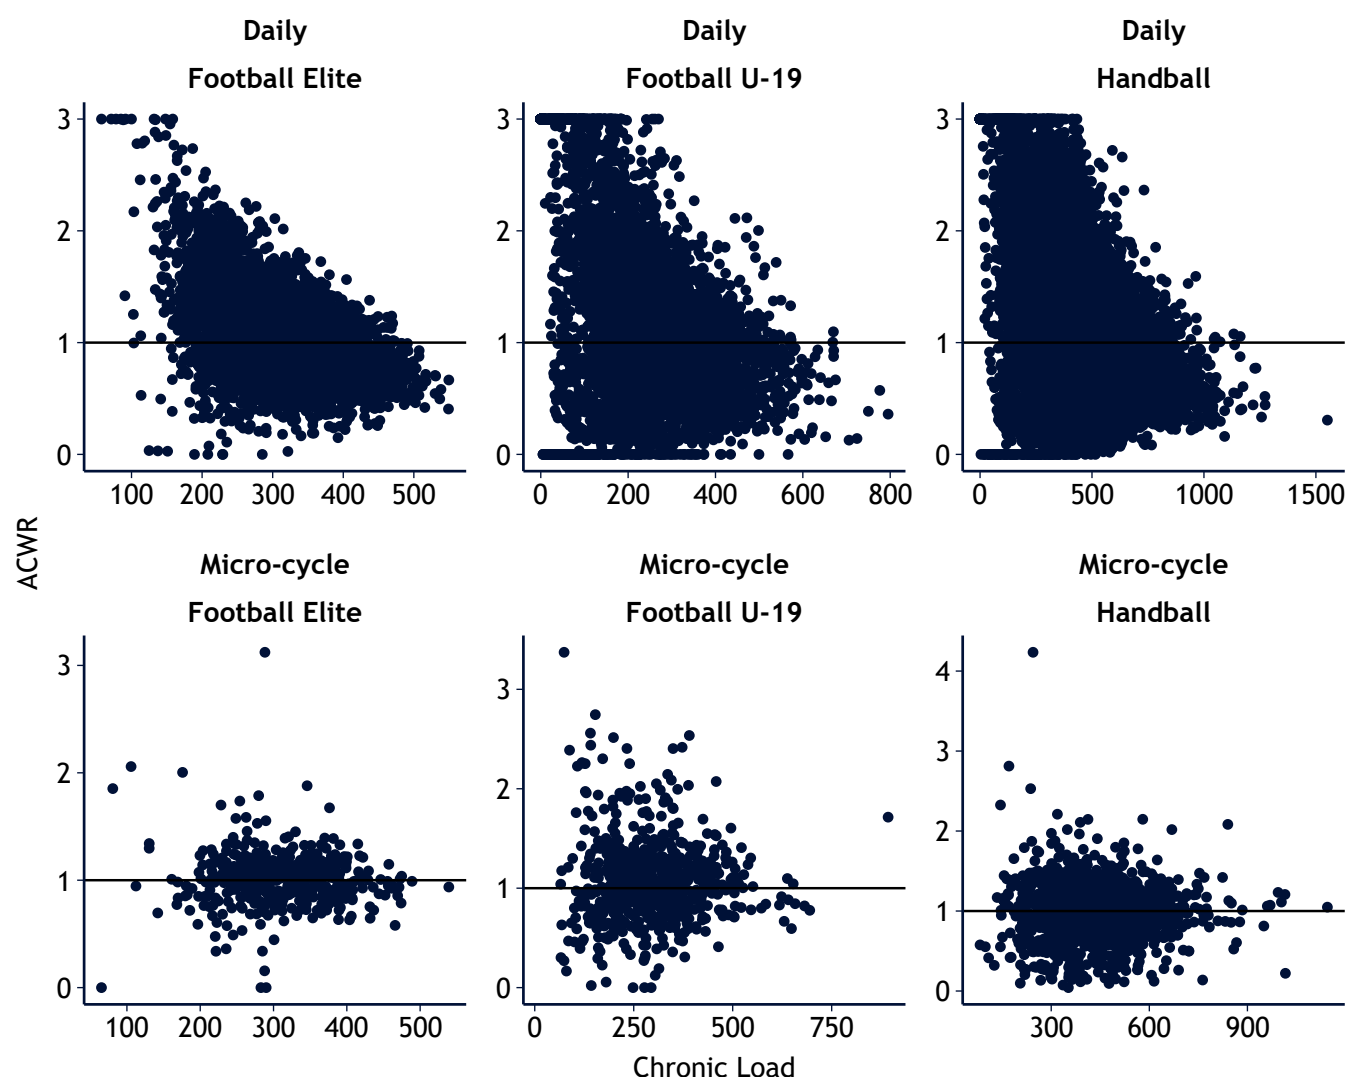

**Figure S3.** Scatterplot of Acute:Chronic Workload Ratio (ACWR) value vs. corresponding chronic load value (the denominator) in the Norwegian Premier League football dataset (Football Elite), the Norwegian elite U-19 football dataset (Football U-19), and Norwegian elite youth handball dataset (Handball). When computing a ratio, one assumes that there is no relationship between the ratio and the denominator after controlling for the denominator; a ratio is only effective when the relationship between the numerator and the denominator is a straight line that intersects the origin.<sup>7</sup> For micro-cycle ACWR, the assumption is upheld, while for daily ACWR, the assumption is violated.

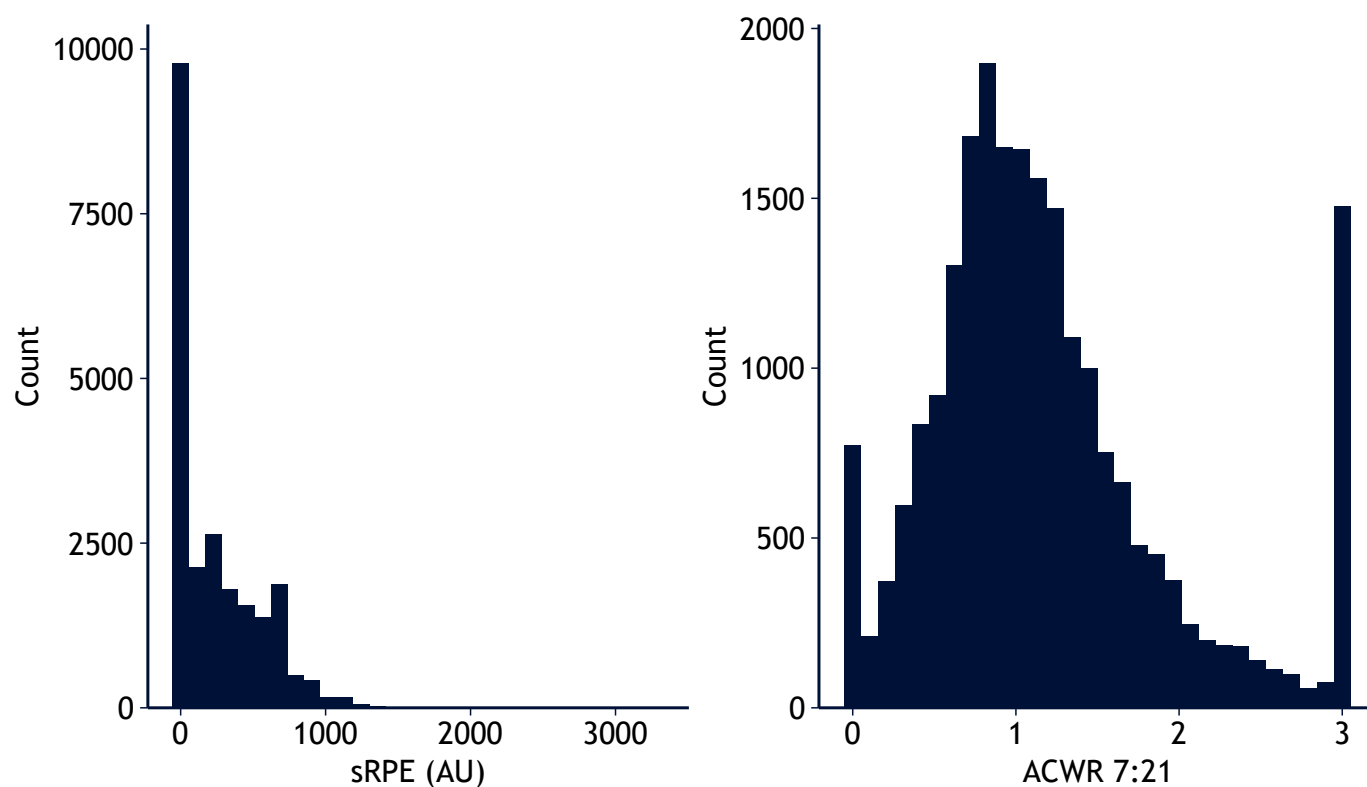

**Figure S4.** Distribution of the session Rating of Perceived Exertion (sRPE) reported in arbitrary units (AU), and distribution of the 7-day Acute Workload divided by 21-Chronic Workload (ACWR 7:21), from the Norwegian elite U-19 football data used as basis for simulations.

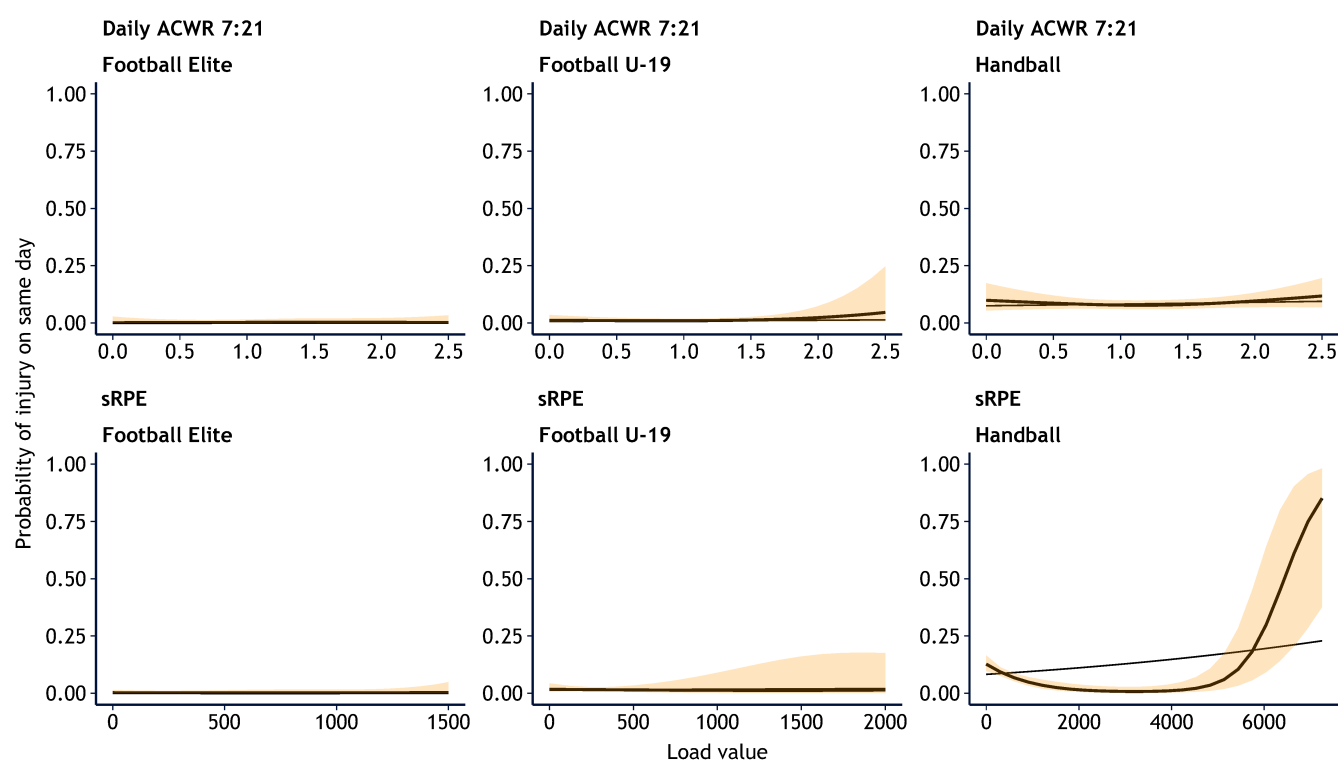

**Figure S5.** Probability of injury on the same day for each level of session Rating of Perceived Exertion (sRPE) and level of daily Acute:Chronic Workload Ratio (ACWR), in Norwegian Premier League (Football Elite), Norwegian elite U-19 football (Football U-19), and Norwegian elite youth handball (Handball). Probabilities are predicted by mixed-effects logistic regression models with restricted cubic splines. The yellow area represents 95% confidence intervals around predicted values. The straight line shows the same predictions from an equivalent model without splines (i.e. assuming linearity).

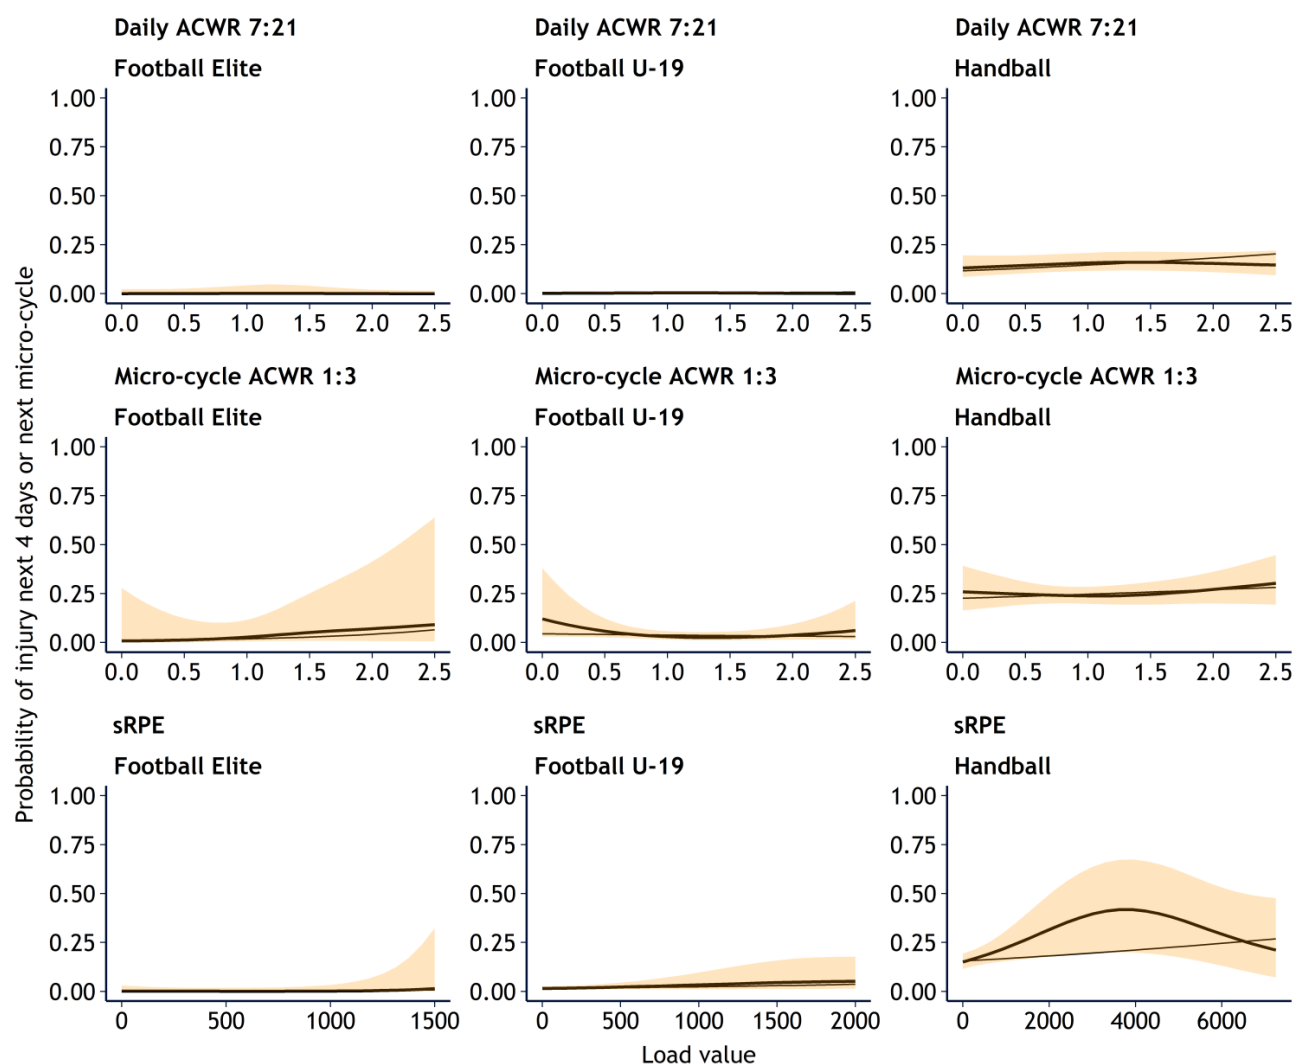

**Figure S6.** Probability of injury in the future for each level of daily Acute:Chronic Workload Ratio (ACWR), level of Micro-cycle ACWR, and level of session Rating of Perceived Exertion (sRPE), in Norwegian Premier League (Football Elite), Norwegian elite U-19 football (Football U-19), and Norwegian elite youth handball (Handball). Future injury was defined as any injury occurring during the next 4 days for all models except micro-cycle models, where future injury was defined as any injury occurring during the next micro-cycle. Probabilities are predicted by mixed-effects logistic regression models with restricted cubic splines. The yellow area represents 95% confidence intervals around predicted values. The straight line shows the same predictions from an equivalent model without splines (i.e. assuming linearity).

## REFERENCES

1. Van Buuren S. Flexible imputation of missing data: Chapman and Hall/CRC 2018.
2. Van Buuren S. Flexible Imputation of Missing Data: CRC Press; 2018 [Second Edition:[Available from: <https://stefvanbuuren.name/fimd/> accessed 2021-02-12.
3. Barzi F, Woodward M. Imputations of missing values in practice: results from imputations of serum cholesterol in 28 cohort studies. *American journal of epidemiology* 2004;160(1):34-45.
4. Moons KG, Donders RA, Stijnen T, et al. Using the outcome for imputation of missing predictor values was preferred. *Journal of clinical epidemiology* 2006;59(10):1092-101.
5. Peters SA, Bots ML, den Ruijter HM, et al. Multiple imputation of missing repeated outcome measurements did not add to linear mixed-effects models. *Journal of clinical epidemiology* 2012;65(6):686-95.
6. Miles A. Obtaining predictions from models fit to multiply imputed data. *Sociological Methods & Research* 2016;45(1):175-85.
7. Curran-Everett D. Explorations in statistics: the analysis of ratios and normalized data. *Advances in physiology education* 2013;37(3):213-19.
